# Supplementary material for: Advancing next-generation nonaqueous Mg–CO 2 batteries: insights into reaction mechanisms and catalyst design
Source: Royal Society of Chemistry journal article supplement (doi:10.1039/d3ta03287f), 2023-01-01
Supplement: d3ta03287f1.pdf [file d3ta03287f1.pdf]

# Supporting Information

## **Advancing Next-Generation Nonaqueous Mg-CO<sub>2</sub> Batteries: Insights into Reaction Mechanisms and Catalyst Design**

Rahul Jayan, Md Mahbubul Islam\*

Department of Mechanical Engineering, Wayne State University, Detroit, MI – 48202, USA

\*Corresponding Author: [gy5553@wayne.edu](mailto:gy5553@wayne.edu)

## Calculation methodology

The charge density difference for the intermediate species adsorbed  $\alpha$ -Mo<sub>2</sub>C (001) was calculated based on the expression  $\rho_b = \rho_{\text{adsorbed state}} - (\rho_{\text{adsorbent}} + \rho_{\text{cat}})$ , where  $\rho_{\text{adsorbed state}}$ ,  $\rho_{\text{adsorbent}}$ , and  $\rho_{\text{cat}}$  denote the charge density of the catalyst with adsorbed reaction intermediates, isolated intermediate species, and the catalytic surface, respectively.<sup>1</sup>

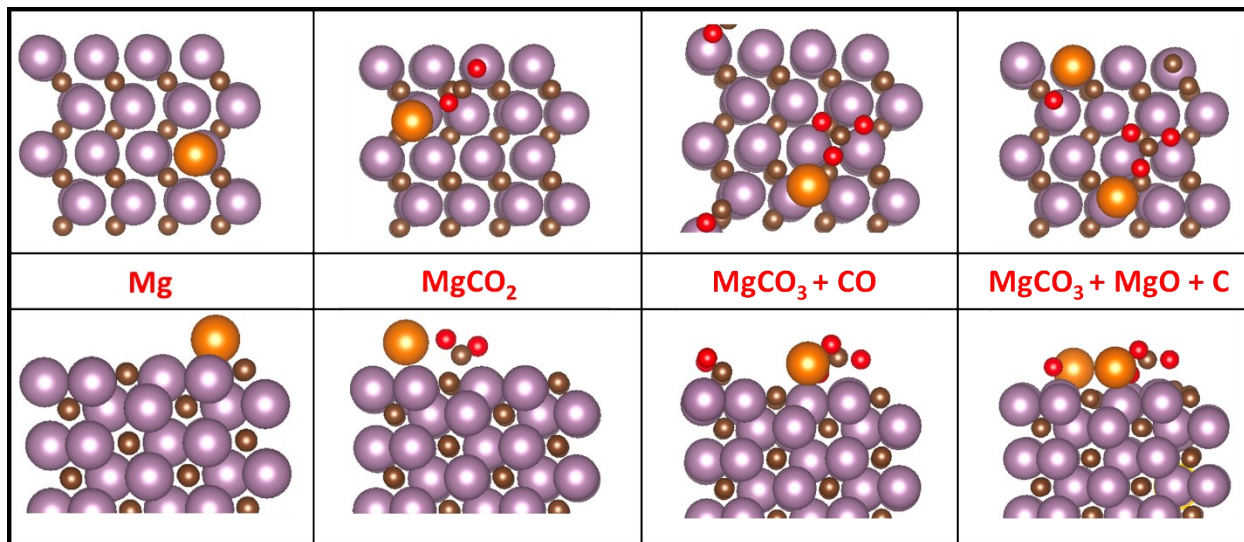

Figure S1. Top and side views of the most stable geometric configuration of MgCO<sub>3</sub> nucleation (Path I)

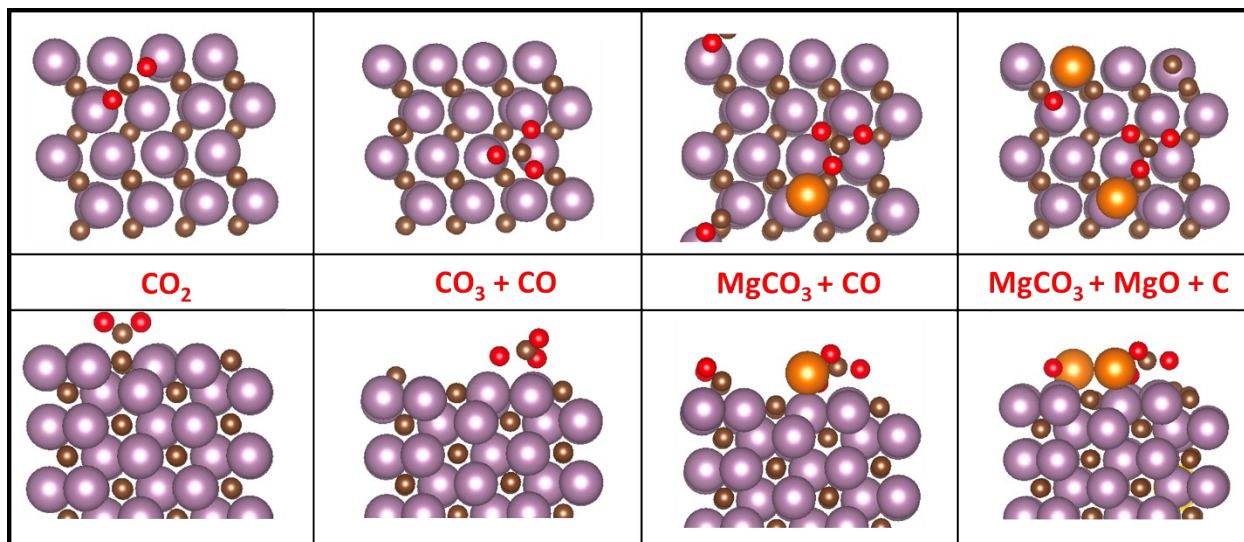

Figure S2. Top and side views of the most stable geometric configuration of MgCO<sub>3</sub> nucleation (Path II)

## S1. Density of states (DOS) calculations

We calculate the density of states (DOS) to understand the electronic structure of the  $\alpha$ - $\text{Mo}_2\text{C}$  (001) catalyst both before and after the adsorption of reaction intermediates. Figure S3 illustrates that the  $\alpha$ - $\text{Mo}_2\text{C}$  (001) catalyst is metallic in nature with electron states around the Fermi level, indicating the material's electronically conductive properties. Furthermore, a comparison of the total density of states (TDOS) before and after intermediate adsorption reveals that electronic conductivity is maintained after adsorption. Furthermore, the d-band center analysis for both  $\text{MgC}_2\text{O}_4$  and  $\text{MgCO}_3$  nucleation showed that the value of  $\text{MgC}_2\text{O}_4$  (-1.062 eV) is closer to the Fermi level than  $\text{MgCO}_3$  (-1.076 eV).

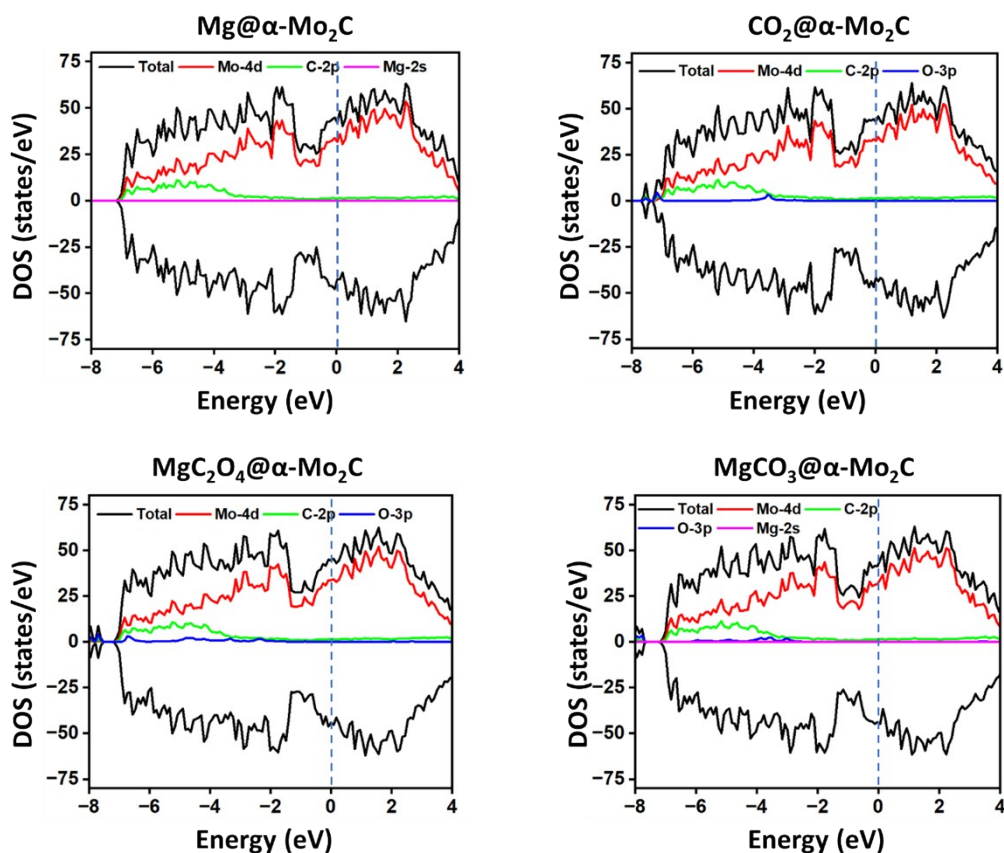

Figure S3. The projected density of states of various reaction intermediate (Mg,  $\text{CO}_2$ ,  $\text{MgC}_2\text{O}_4$  and  $\text{MgCO}_3$ ) adsorbed  $\alpha$ - $\text{Mo}_2\text{C}$  (001) surface. The Fermi level is denoted by the dotted line.

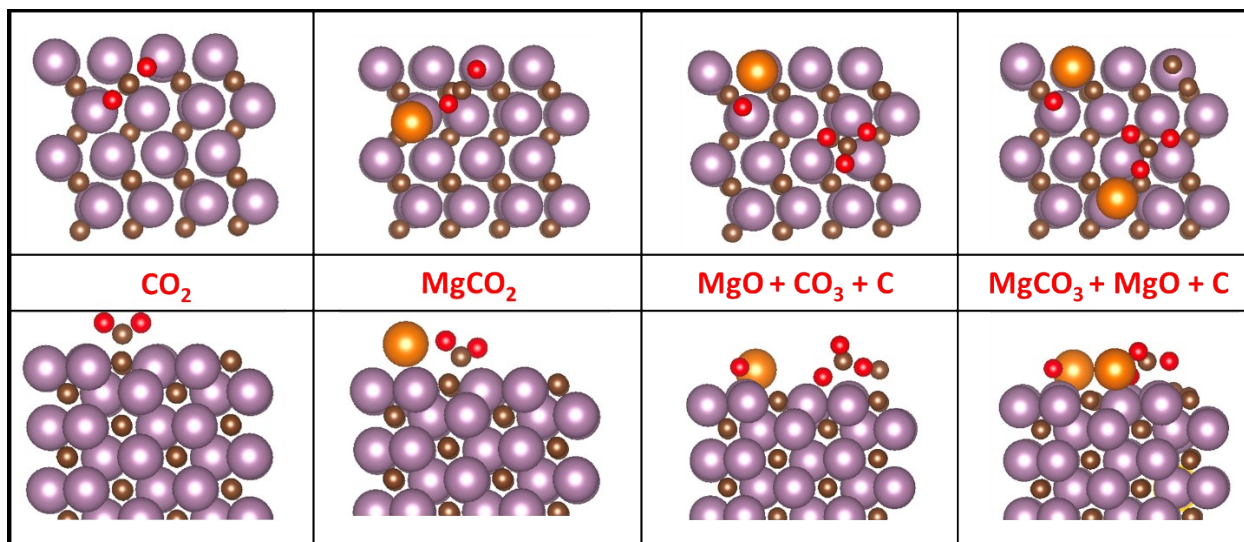

Figure S4. Top and side views of the most stable geometric configuration of MgCO<sub>3</sub> nucleation (Path V)

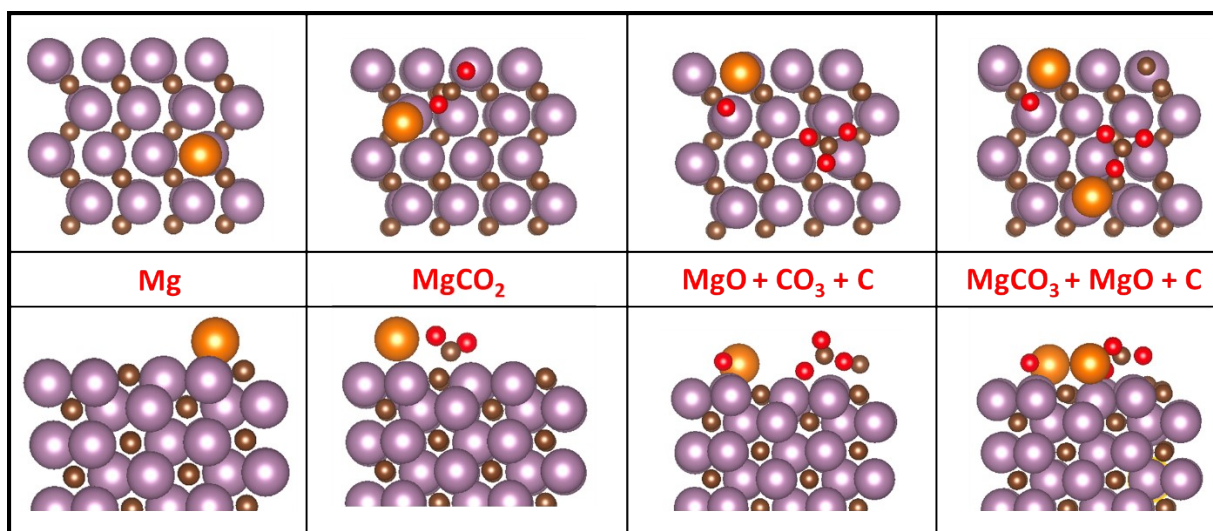

Figure S5. Top and side views of the most stable geometric configuration of MgCO<sub>3</sub> nucleation (Path VI)

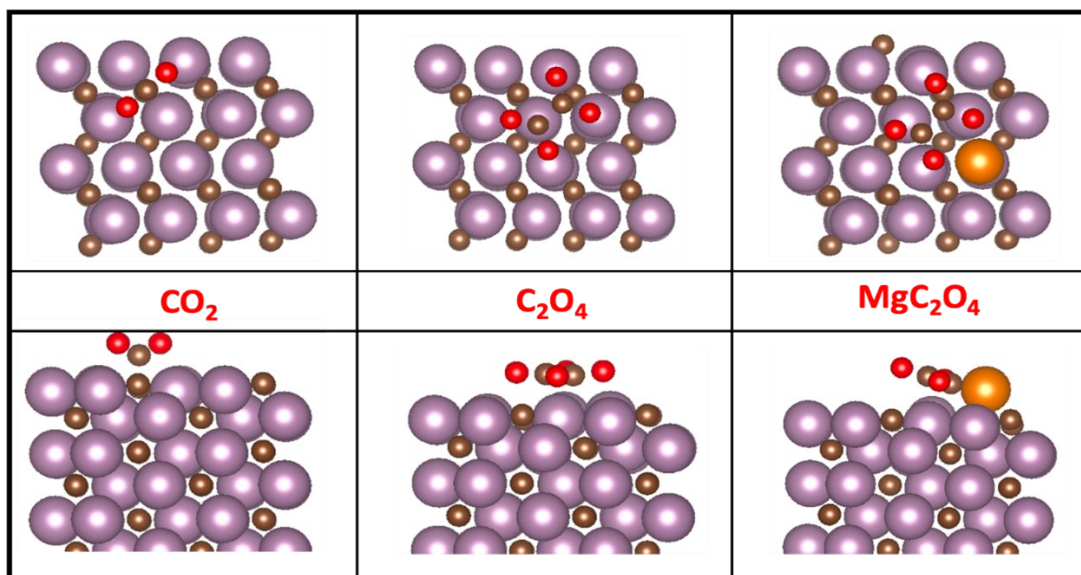

Figure S6. Top and side views of the most stable geometric configuration of  $\text{MgC}_2\text{O}_4$  nucleation (Path III)

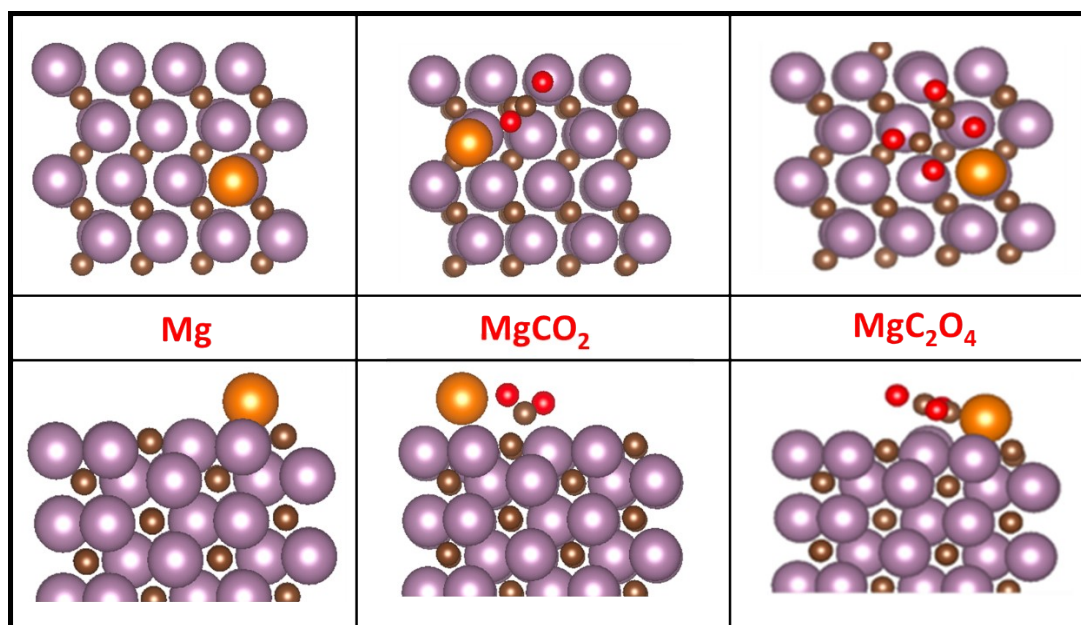

Figure S7. Top and side views of the most stable geometric configuration of  $\text{MgC}_2\text{O}_4$  nucleation (Path IV)

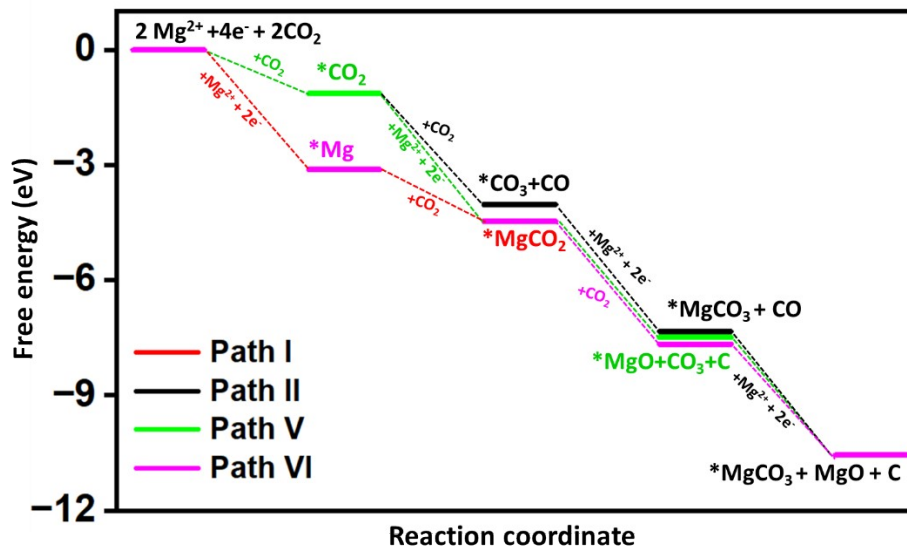

Figure S8. Computed Gibbs free energies of various reaction intermediate pathways for  $\text{MgCO}_3$  nucleation at  $U=0\text{V}$

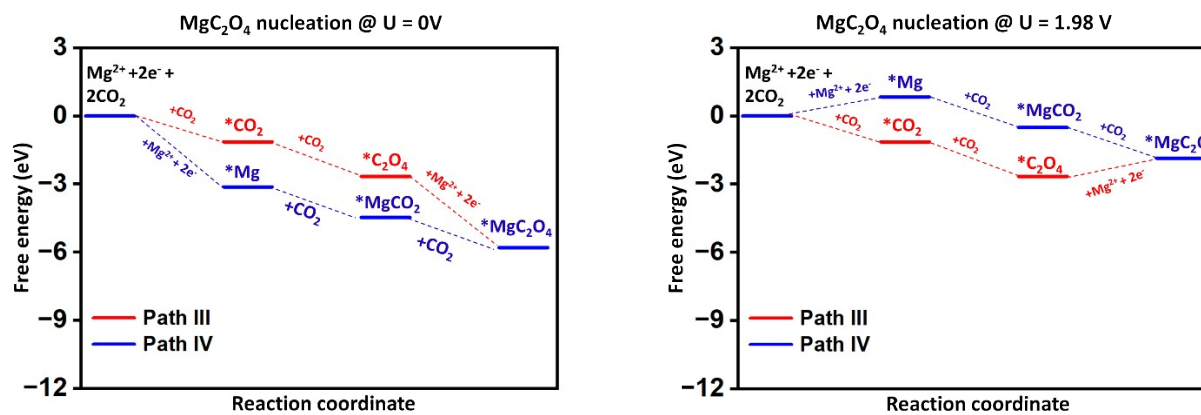

Figure S9. Computed Gibbs free energies of various reaction intermediate pathways for  $\text{MgC}_2\text{O}_4$  nucleation at  $U=0\text{V}$  and  $1.98\text{V}$

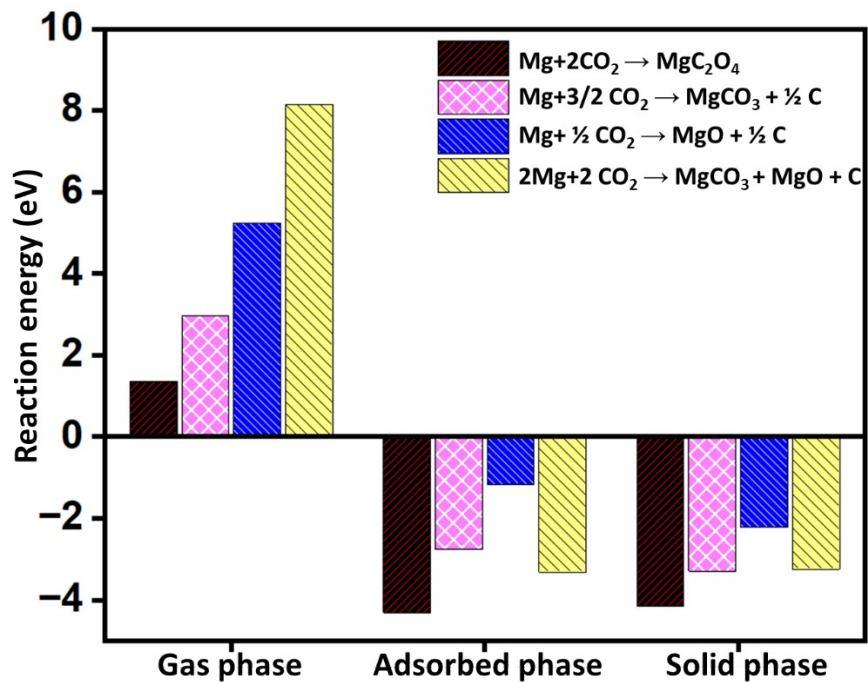

Figure S10. The calculated reaction energies for the formation of various Mg salts in gas, adsorbed, and solid phases

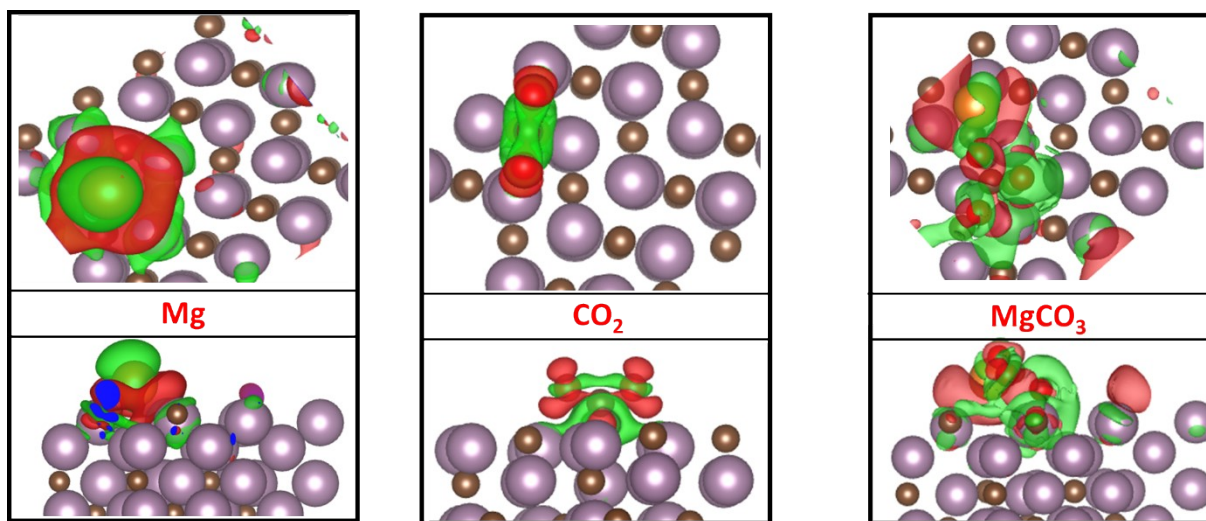

Figure S11. Snapshot of charge density difference (DCD) for Mg, CO<sub>2</sub> and MgCO<sub>3</sub> adsorbed  $\alpha$ -Mo<sub>2</sub>C (001)

## Standard Gibbs Free energies and equilibrium voltage calculations

For MgCO<sub>3</sub> and MgC<sub>2</sub>O<sub>4</sub> nucleation, the overall chemical reaction can be written as

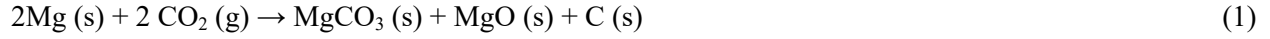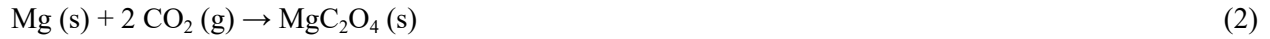

From the above chemical reactions, the standard Gibbs free energies of both MgCO<sub>3</sub> (s) and MgC<sub>2</sub>O<sub>4</sub> (s) can be calculated as

$$\Delta G^{\circ}_f (\text{MgCO}_3)_s = G^{\circ} (\text{MgCO}_3)_s + G^{\circ} (\text{MgO})_s + G^{\circ} (\text{C})_s - 2 G^{\circ} (\text{Mg})_s - 2 G^{\circ} (\text{CO}_2)_g \quad (3)$$

$$\Delta G^{\circ}_f (\text{MgC}_2\text{O}_4)_s = G^{\circ} (\text{MgC}_2\text{O}_4)_s - G^{\circ} (\text{Mg})_s - 2 G^{\circ} (\text{CO}_2)_g \quad (4)$$

Overall, from the standard free energy calculations, the value of  $\Delta G^{\circ}_f (\text{MgCO}_3)_s$  and  $\Delta G^{\circ}_f (\text{MgC}_2\text{O}_4)_s$  was calculated to be -8.55eV and -3.98 eV, respectively. From the Nernst equation,

$$U_0 (\text{M}) = - \Delta G^{\circ}_f / ne \quad (5)$$

where n and e represent the number of transferred electrons and electronic charge and the value of equilibrium potential  $U_0 (\text{MgCO}_3)$  and  $U_0 (\text{MgC}_2\text{O}_4)$  was calculated to be 2.13 V and 1.98 V.

## Electrochemical free energy changes during the discharging and charging processes

For the studied catalyst, the electrochemical free energy change for the most favorable pathway during the discharging/charging process is calculated based on the expression:

$$(\Delta G_E (\text{Mg-CO}_2)) = E_{\text{total}} - \{E_{\text{prev}} + n_{\text{Mg}} (\mu_{\text{Mg}}) + n_{\text{CO}_2} (\mu_{\text{CO}_2})\} \quad (6)$$

$E_{\text{total}}$  and  $E_{\text{prev}}$  represents energy of the total system and energy of the previous step.  $n_{\text{Mg}}$ ,  $n_{\text{CO}_2}$ ,  $\mu_{\text{Mg}}$  and  $\mu_{\text{CO}_2}$  denotes the number of Mg, CO<sub>2</sub> and chemical potential of Mg and CO<sub>2</sub>.

$$\text{Discharge overpotential } (\eta_{\text{dis}}) = U_{\text{eq}} - U_{\text{dis}}, \quad (7)$$

$$\text{Charge overpotential } (\eta_{\text{chg}}) = U_{\text{chg}} - U_{\text{eq}}, \quad (8)$$

$$\text{Total overpotential } (\Delta E_{\text{total}}) = \eta_{\text{dis}} + \eta_{\text{chg}} \quad (9)$$



**Table S1**

The calculated zero-point energies and entropies for all the studied reaction intermediates for the studied  $\alpha$ -Mo<sub>2</sub>C (001) substrate

| <b>Reaction intermediates</b>   | <b>ZPE</b> | <b>TS</b> |
|---------------------------------|------------|-----------|
| Mg                              | 0.037      | 0.146     |
| CO <sub>2</sub>                 | 0.332      | 0.178     |
| MgCO <sub>2</sub>               | 0.368      | 0.217     |
| MgCO <sub>3</sub> + CO          | 0.657      | 0.306     |
| MgCO <sub>3</sub> + MgO + C     | 0.693      | 0.277     |
| CO <sub>3</sub> + CO            | 0.613      | 0.266     |
| MgO + CO <sub>3</sub> + C       | 0.647      | 0.297     |
| C <sub>2</sub> O <sub>4</sub>   | 0.648      | 0.235     |
| MgC <sub>2</sub> O <sub>4</sub> | 0.681      | 0.261     |

#### References

1 K. Momma and F. Izumi, *J Appl Cryst*, 2011, **44**, 1272–1276.
